# Supplementary material for: Effect of Deep Eutectic System (DES) on Oral Bioavailability of Celecoxib: In Silico, In Vitro, and In Vivo Study
Source: MDPI journal article supplement (doi:10.3390/pharmaceutics15092351), 2023-09-20
Supplement: s1 [file s1]

# Effect of Deep Eutectic System (DES) on Oral Bioavailability of Celecoxib: In Silico, In Vitro, and In Vivo Study

Soumalya Chakraborty <sup>1</sup>, Rohit Y. Sathe <sup>2,†</sup>, Jaydeep H. Chormale <sup>1</sup>, Ashish Dangi <sup>3</sup>, Prasad V. Bharatam <sup>2</sup> and Arvind K. Bansal <sup>1,\*</sup>

<sup>1</sup> Department of Pharmaceutics, National Institute of Pharmaceutical Education and Research (NIPER), Sector-67, S.A.S. Nagar 160062, Punjab, India; sc280562@gmail.com (S.C.); jaydeep1591@gmail.com (J.H.C.)

<sup>2</sup> Department of Medicinal Chemistry, National Institute of Pharmaceutical Education and Research (NIPER), Sector-67, S.A.S. Nagar 160062, Punjab, India; rohitysathe@gmail.com (R.Y.S.); pvbharatam@niper.ac.in (P.V.B.)

<sup>3</sup> Department of Pharmacology and Toxicology, National Institute of Pharmaceutical Education and Research (NIPER), Sector-67, S.A.S. Nagar 160062, Punjab, India; ashishdangi0@gmail.com

\* Correspondence: akbansal@niper.ac.in; Tel.: +91-172-2214682-2126; Fax: +91-172-2214692

† Current Address: DBT-ICT Centre for Energy Biosciences, Institute of Chemical Technology, Mumbai 400019, Maharashtra, India.

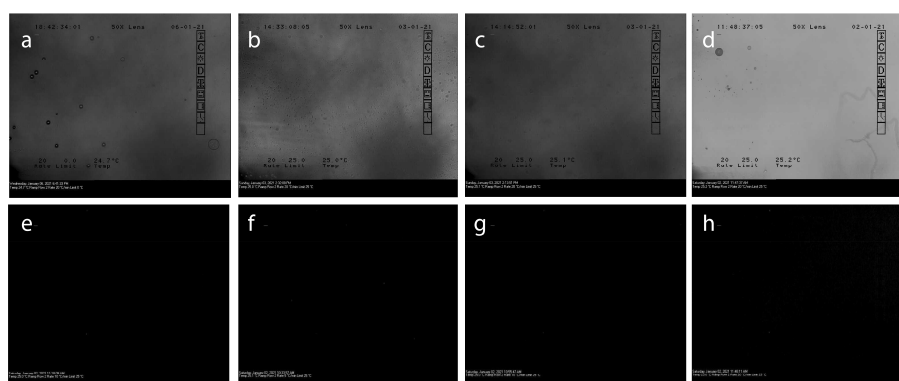

**Figure S1.** Optical (a–d) and PLM (e–h) images of DES of (a,e) CC-UA (1:2), (b,f) CC-GLY (1:2), (c,g) CC-MA (1:1), and (d,h) CC-AA (2:1).

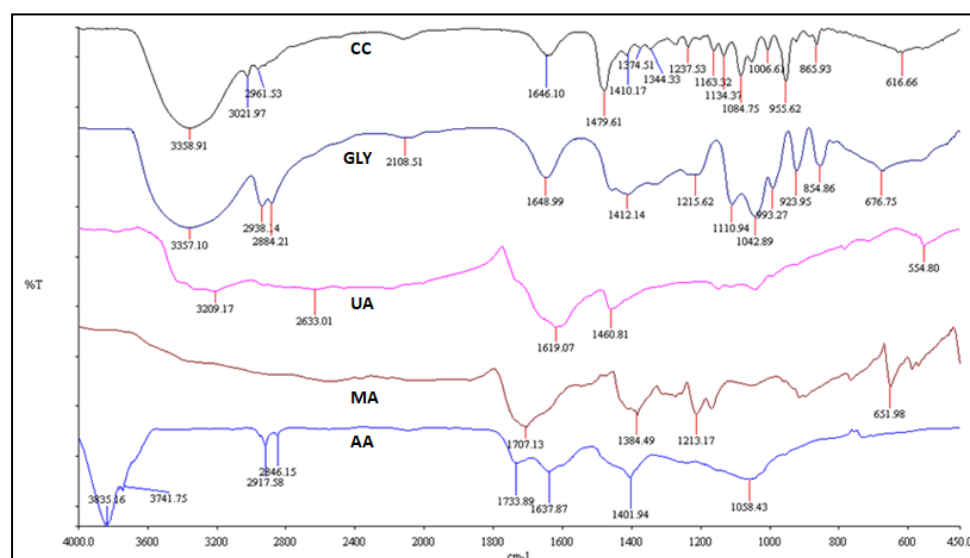

**Figure S2.** FTIR spectra of pure components.

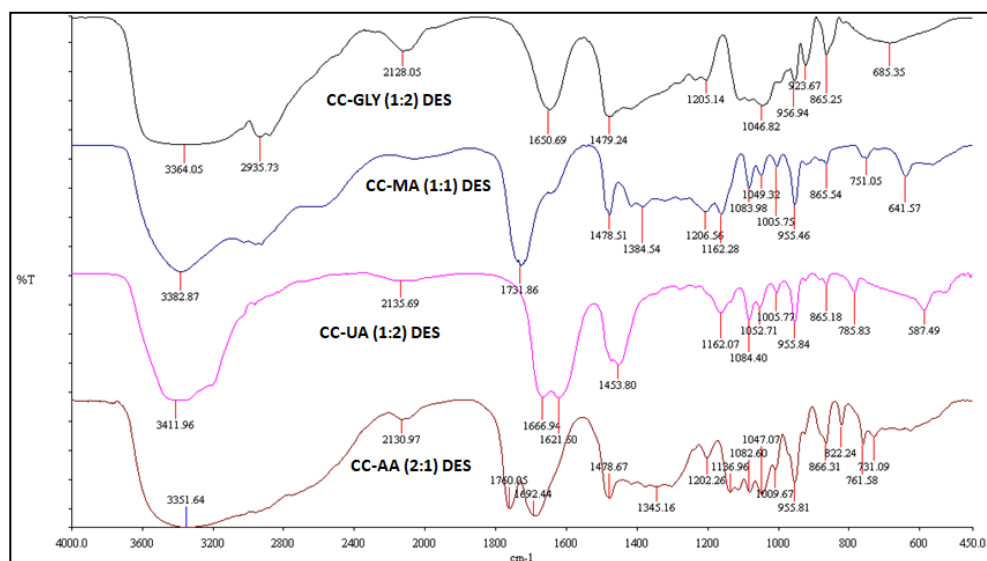

Figure S3. FTIR spectra of DESs.

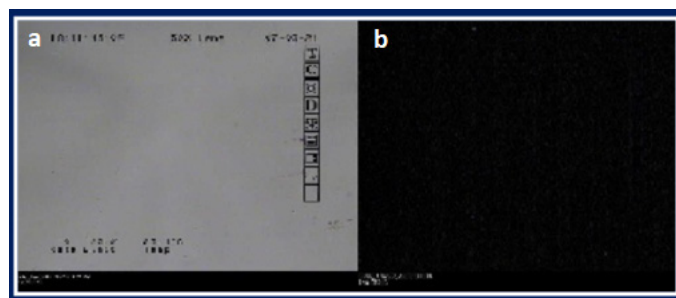

Figure S4. Optical (a) and polarized (b) microscopic images of pure CLX-DES system.

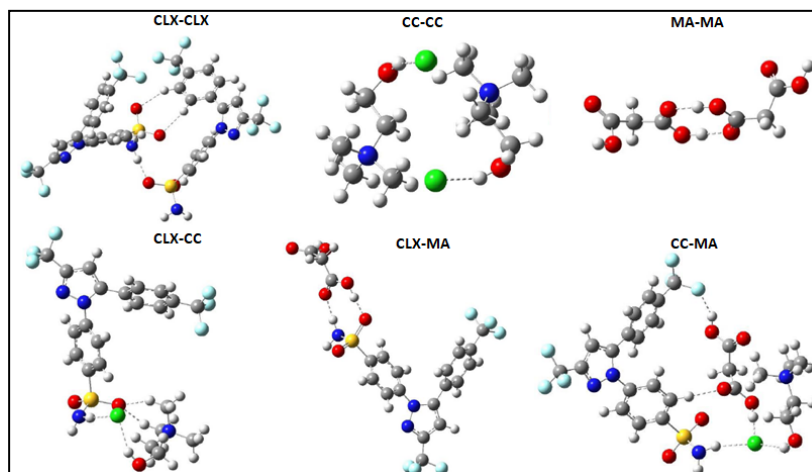

Figure S5. Optimized geometries of all the possible homo- and hetero-molecular pairs of CLX, CC, and MA.

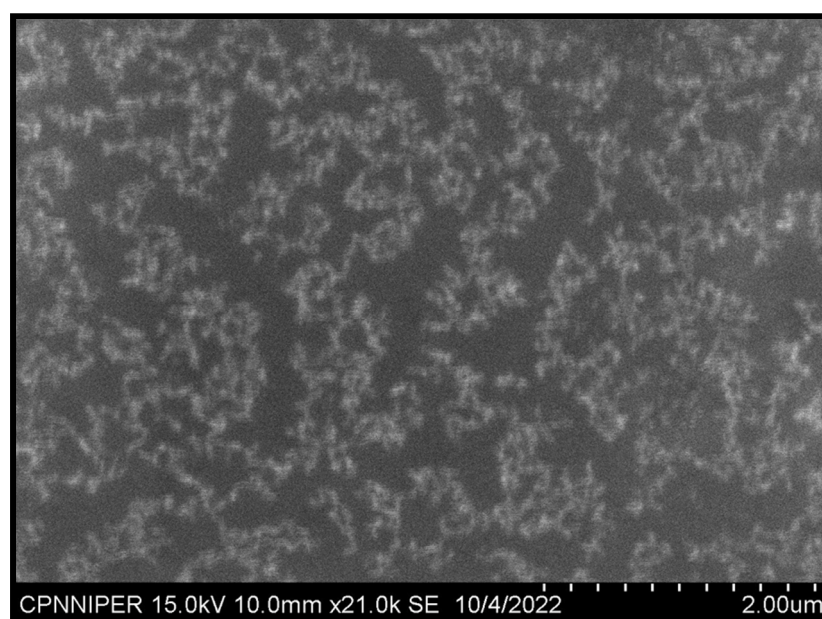

**Figure S6.** SEM image of blank FaSSIF containing vesicular structures.

**Table S1.** Percentage assay value and PLM images of CLX-DES system after 15 and 30 days storage at 40°C/75% RH.

| Time (Days) | Assay (%) | PLM                                                                                   |
|-------------|-----------|---------------------------------------------------------------------------------------|
| 0           | 100.01    | 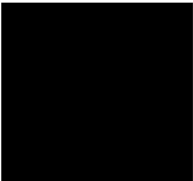 |
| 15          | 99.15     |  |
| 30          | 99.72     |  |
